# Supplementary material
Source: MDPI journal article supplement (https://www.mdpi.com/2073-445X/7/4/118)
Supplement: s1 [file s1]

# Characterizing the Spatial and Temporal Availability of Very High Resolution Satellite Imagery in Google Earth and Microsoft Bing Maps as a Source of Reference Data

Myroslava Lesiv \*, Linda See, Juan Carlos Laso Bayas, Tobias Sturn, Dmitry Schepaschenko, Matthias Karner, Inian Moorthy, Ian McCallum and Steffen Fritz

This supplementary material supports the main text as follows:

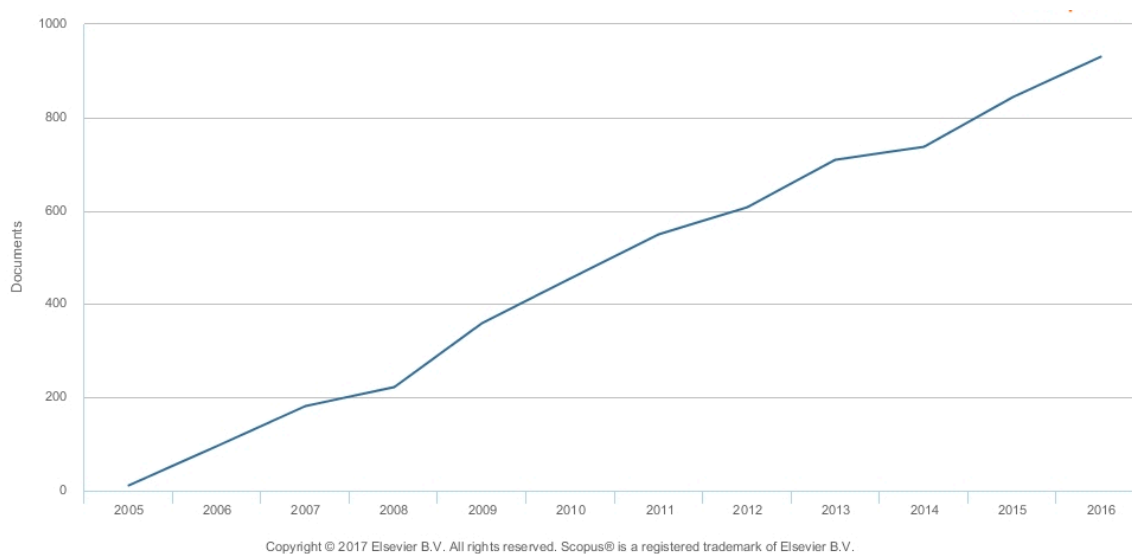

**Figure S1.** The number of scientific documents that mention the search terms “Google Earth” or “Microsoft Bing imagery” in Scopus® (n=5756) from 2005 to 2016.

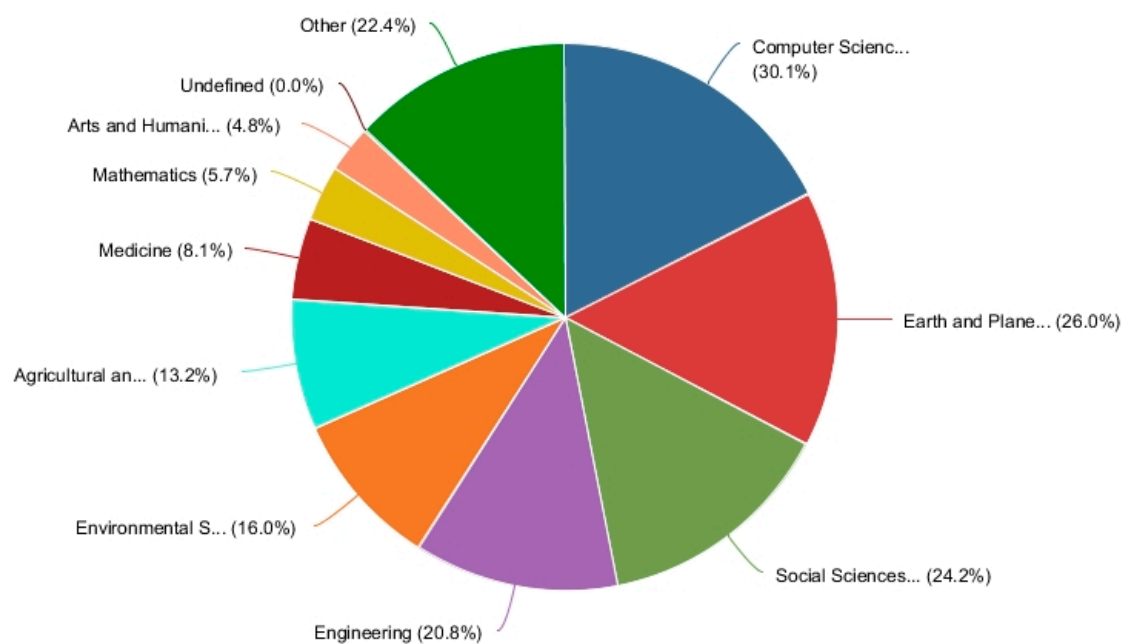

Copyright © 2017 Elsevier B.V. All rights reserved. Scopus® is a registered trademark of Elsevier B.V.

**Figure S2.** The distribution of documents by subject area that appear in Scopus® from the period 2005 to 2016 containing the search terms “Google Earth” or “Microsoft Bing imagery”.

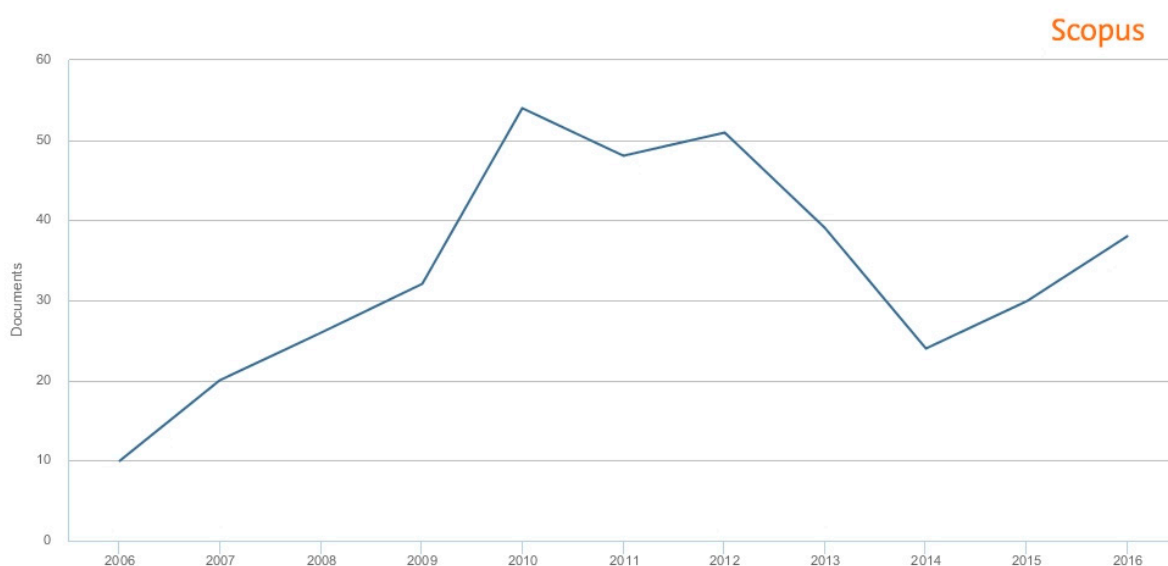

Copyright © 2017 Elsevier B.V. All rights reserved. Scopus® is a registered trademark of Elsevier B.V.

**Figure S3.** The number of scientific documents found in Scopus® that mention the search terms “Google Earth” or “Microsoft Bing imagery” and additionally contain the search terms “Validation”, “Visualization” or “Calibration” in the abstract (n=372) from 2006 to 2016 to focus in on paper in the field of remote sensing.

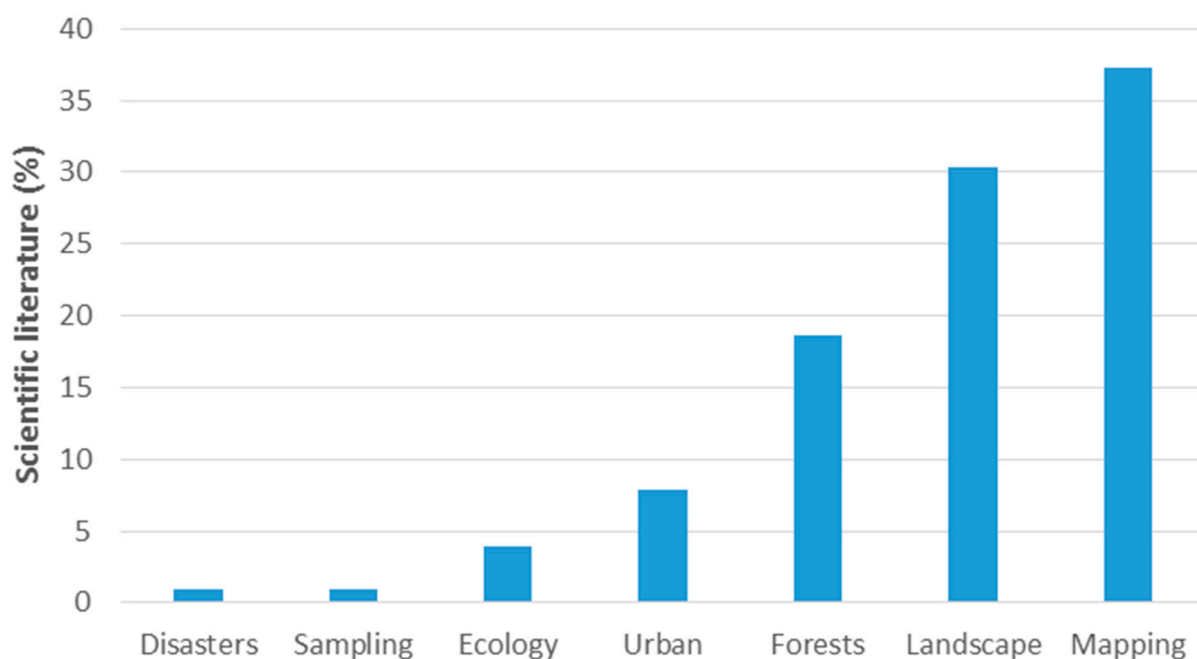

**Figure S4.** Documents using Google Earth imagery for remote sensing purposes broken down by purpose or thematic area (n=102).

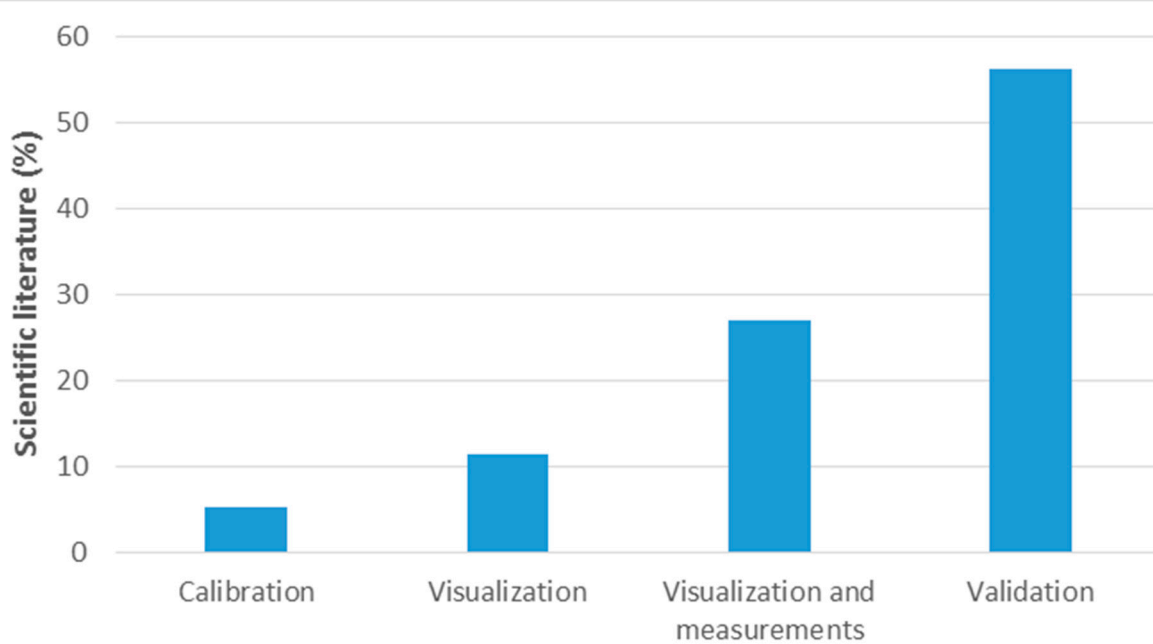

**Figure S5.** Documents using Google Earth imagery for remote sensing purposes broken down by different remote sensing activities (n=96).

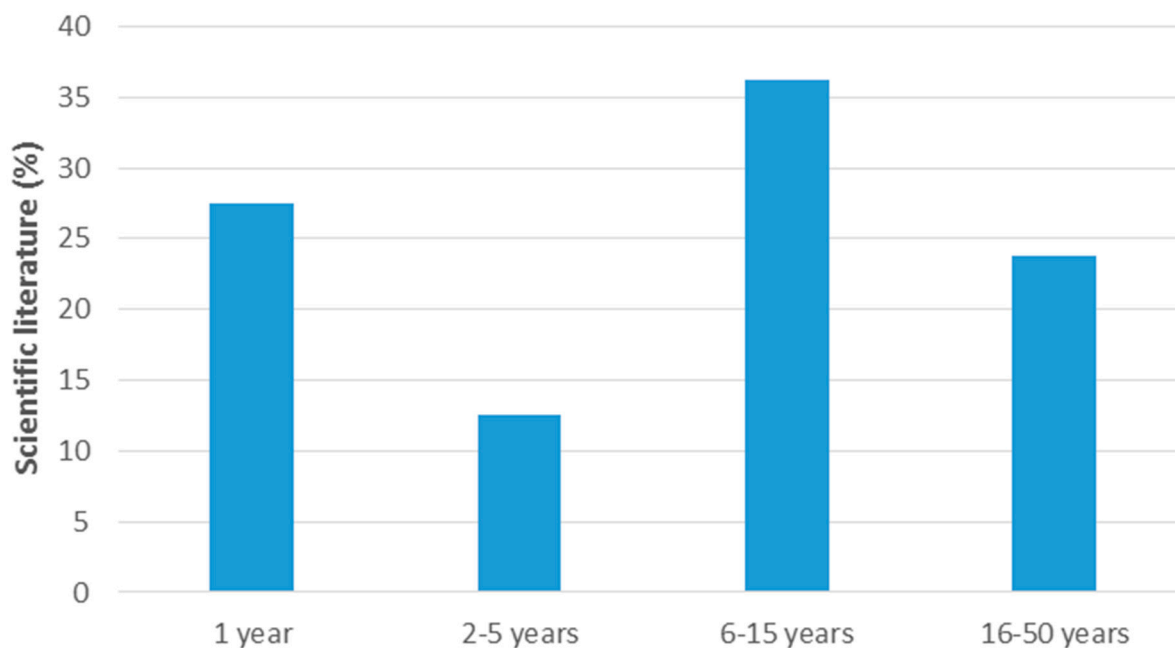

**Figure S6.** Range of images reported as employed in studies using Google Earth imagery for remote sensing (n=80).

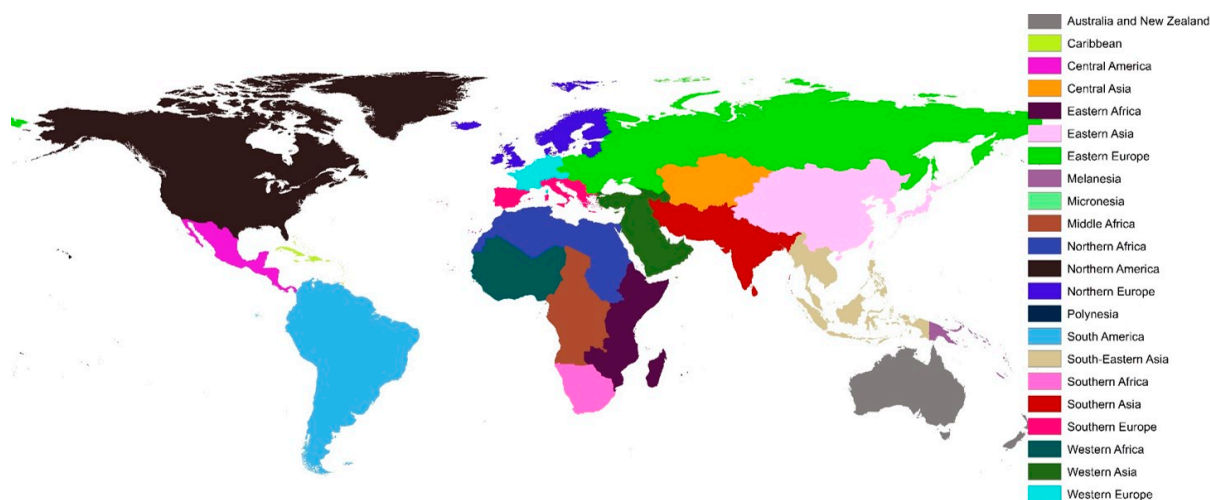

**Figure S7.** World regions from FAO. The Global Administrative Unit Layers (GAUL, FAO Global Administrative Unit Layers (GAUL). Available at: <http://www.fao.org/geonetwork/srv/en/metadata.show?id=12691> 2014) data set was obtain from the United Nations Food and Agriculture Organization (FAO). The world regions shown in Supplementary Figure 12, were used to calculate the zonal summary statistics that are presented in Tables 1 and 2. The country boundaries were used to calculate the zonal summary statistics that are presented in Tables 3 and 4. In Table 3, the Amazon region has been delineated using sub-national boundaries for administrative level 1 from GAUL while the Congo basin is the merger of 10 countries: Angola, Burundi, Cameroon, Central African Republic, Democratic Republic of the Congo, Republic of the Congo, Rwanda, South Sudan, Tanzania and Zambia. Countries boundaries have been used in Figures 1 to 8, as a background layer (Software: Esri®ArcMap™ 10.1).

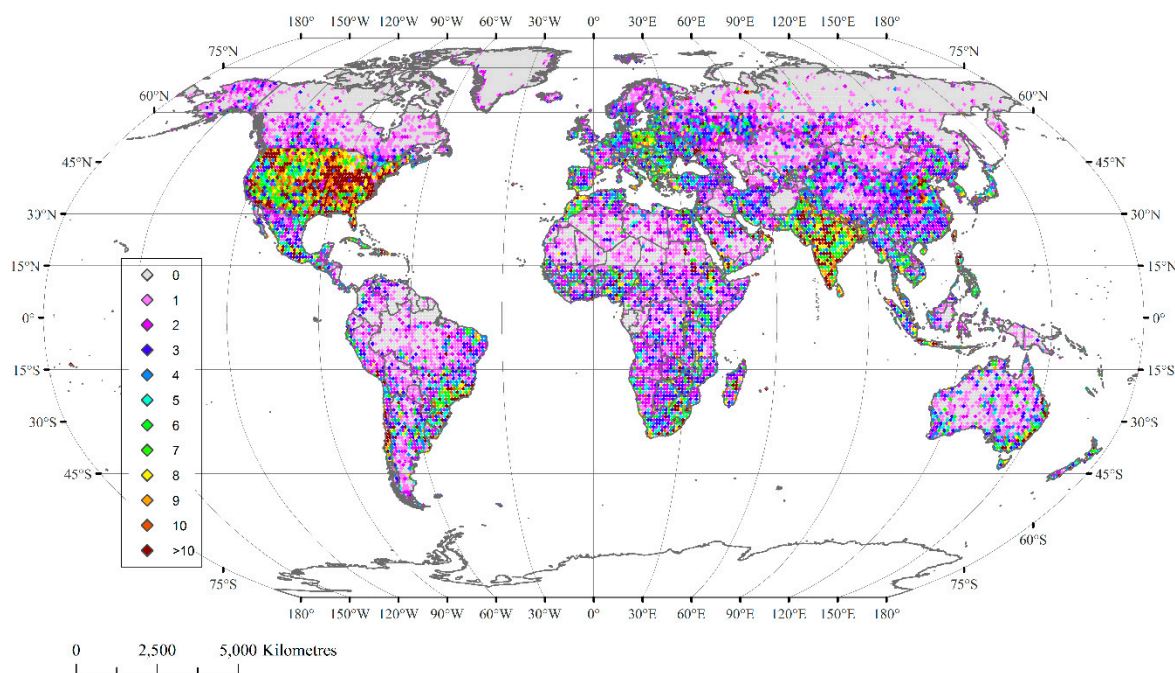

**Figure S8.** The number of VHR historical satellite images (< 5 m resolution) available in Google Earth (Software: Esri@ArcMap™ 10.1).

**Table S1.** Correlation (Pearson correlation coefficient) between the number of images at a location and the population density, reported by FAO world region ranked in ascending order by positive correlation.

| Region                            | Total number of grid points | Correlation of number of images with population | P-values |
|-----------------------------------|-----------------------------|-------------------------------------------------|----------|
| Northern Africa                   | 536                         | 0.46                                            | <0.001   |
| South America                     | 372                         | 0.40                                            | <0.001   |
| Western Asia                      | 740                         | 0.38                                            | <0.001   |
| Eastern Europe                    | 219                         | 0.29                                            | <0.001   |
| Eastern Asia                      | 3129                        | 0.23                                            | <0.001   |
| Australia and New Zealand         | 468                         | 0.21                                            | <0.001   |
| Northern America                  | 3421                        | 0.19                                            | <0.001   |
| Southern Africa                   | 727                         | 0.15                                            | 0.016    |
| Northern Europe                   | 1534                        | 0.11                                            | 0.041    |
| Central Asia                      | 318                         | 0.11                                            | 0.014    |
| Middle Africa                     | 1212                        | 0.10                                            | 0.016    |
| Western Africa                    | 415                         | 0.10                                            | 0.019    |
| Southern Europe                   | 136                         | 0.09                                            | 0.287    |
| Western Europe                    | 142                         | 0.06                                            | 0.483    |
| South-\astern Asia                | 509                         | 0.05                                            | 0.25     |
| Southern Asia                     | 243                         | 0.05                                            | 0.203    |
| Eastern Africa                    | 583                         | 0.05                                            | 0.273    |
| Central America (incl. Caribbean) | 530                         | 0.02                                            | 0.776    |

**Table S2:** Availability of VHR imagery inside and outside of cropland areas for selected countries. The shaded countries indicate those locations where more imagery is available in areas of cropland compared to those falling outside. .

| Countries                   | Total number of points | Coverage with very high resolution imagery in Google Earth | Summary of locations that fall within cropland area         |                                 |                  |                        |                                     | Summary of locations that fall outside cropland area        |                                 |                  |                        |                                     |      |
|-----------------------------|------------------------|------------------------------------------------------------|-------------------------------------------------------------|---------------------------------|------------------|------------------------|-------------------------------------|-------------------------------------------------------------|---------------------------------|------------------|------------------------|-------------------------------------|------|
|                             |                        |                                                            | Number of points where high resolution images are available | Most frequent max Year (Google) | Number of images | Number of unique years | Most frequent year (Microsoft Bing) | Number of points where high resolution images are available | Most frequent max Year (Google) | Number of images | Number of unique years | Most frequent year (Microsoft Bing) |      |
| Top countries with highest  | Angola                 | 102                                                        | 95%                                                         | 13                              | 2013             | 2                      | 2                                   | 2012                                                        | 84                              | 2013             | 3                      | 2                                   | 2013 |
|                             | Chad                   | 105                                                        | 52%                                                         | 11                              | 2013             | 2                      | 2                                   | 2013                                                        | 44                              | 2013             | 2                      | 2                                   | 2012 |
|                             | Ethiopia               | 91                                                         | 91%                                                         | 31                              | 2016             | 6                      | 3                                   | 2012                                                        | 52                              | 2013             | 3                      | 2                                   | 2012 |
|                             | Mongolia               | 183                                                        | 64%                                                         |                                 |                  |                        |                                     |                                                             | 117                             | 2007             | 2                      | 1                                   | 2012 |
|                             | Mozambique             | 68                                                         | 99%                                                         | 4                               | 2013             | 2                      | 2                                   | 2012                                                        | 63                              | 2013             | 3                      | 3                                   | 2012 |
|                             | Namibia                | 75                                                         | 100%                                                        | 3                               | 2016             | 5                      | 3                                   | 2012                                                        | 72                              | 2013             | 3                      | 3                                   | 2013 |
| Top countries with cropland | Nigeria                | 74                                                         | 99%                                                         | 53                              | 2016             | 6                      | 4                                   | 2012                                                        | 20                              | 2015             | 4                      | 3                                   | 2011 |
|                             | Indonesia              | 153                                                        | 81%                                                         | 22                              | 2016             | 7                      | 4                                   | 2012                                                        | 102                             | 2015             | 4                      | 3                                   | 2010 |
|                             | Brazil                 | 705                                                        | 71%                                                         | 48                              | 2014             | 4                      | 3                                   | 2011                                                        | 450                             | 2014             | 4                      | 3                                   | 2010 |
|                             | Argentina              | 284                                                        | 82%                                                         | 56                              | 2016             | 4                      | 3                                   | 2013                                                        | 176                             | 2013             | 4                      | 3                                   | 2013 |
|                             | Tanzania               | 77                                                         | 94%                                                         | 26                              | 2015             | 4                      | 3                                   | 2012                                                        | 46                              | 2014             | 3                      | 2                                   | 2012 |
| Top countries               | Australia              | 699                                                        | 69%                                                         | 44                              | 2015             | 4                      | 3                                   | 2014                                                        | 437                             | 2013             | 3                      | 2                                   | 2014 |
|                             | India                  | 274                                                        | 100%                                                        | 170                             | 2016             | 9                      | 5                                   | 2015                                                        | 104                             | 2016             | 8                      | 5                                   | 2015 |
|                             | Sudan                  | 209                                                        | 77%                                                         | 27                              | 2015             | 3                      | 2                                   | 2012                                                        | 133                             | 2013             | 3                      | 2                                   | 2012 |
| USA                         | 1108                   | 90%                                                        | 171                                                         | 2015                            | 10               | 9                      | 2011                                | 826                                                         | 2014                            | 7                | 6                      | 2011                                |      |
